# Supplementary material for: TREM-2 promotes Th1 responses by interacting with the CD3ζ-ZAP70 complex following Mycobacterium tuberculosis infection
Source: JCI journal article supplement (doi:10.1172/jci137407), 2021-08-31
Supplement: sd1 [file 1]

1 **Supplementary data**

2

3

4 **TREM-2 promotes Th1 responses by interacting with CD3  $\zeta$ /ZAP70 following**  
5 **Mycobacterium tuberculosis infection**

6 Yongjian Wu, Minhao Wu, Siqu Ming, Xiaoxia Zhan, Shengfeng Hu, Xingyu Li, Huan  
7 Yin, Can Cao, Jiao Liu, Jinai Li, Zhilong Wu, Jie Zhou, Lei Liu, Sitang Gong,  
8 Duanman He and Xi Huang

9

10

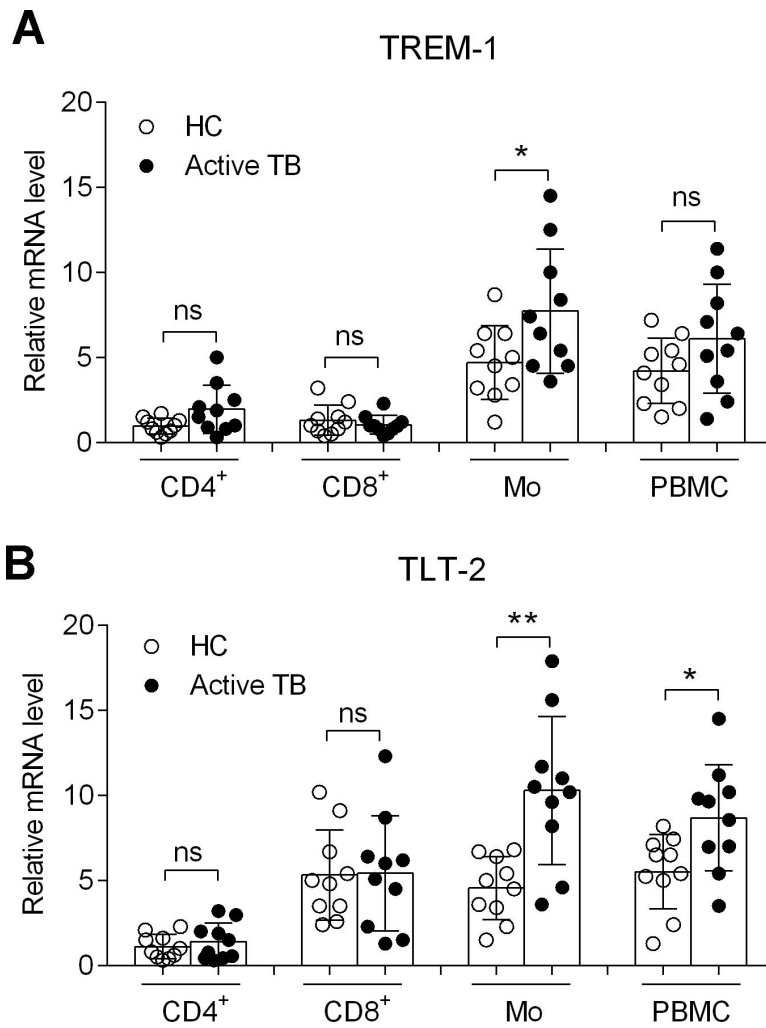

12

13 **Figure S1. The expression of TREM-1 and TLT2 in HC and active TB patients.**14 (A, B) The expression levels of TREM-1(A) and TLT-2 (B) in CD4<sup>+</sup> T cells, CD8<sup>+</sup> T15 cells, CD14<sup>+</sup> monocytes (Mo) or PBMCs from healthy donors (HC) or active

16 tuberculosis (TB) patients were analyzed by quantitative real-time PCR. Data

17 represent mean ± SD. Unpaired Student's t-test was performed in A-B. ns, no

18 significant difference. \* $P < 0.05$ , \*\* $P < 0.01$ .

19

20

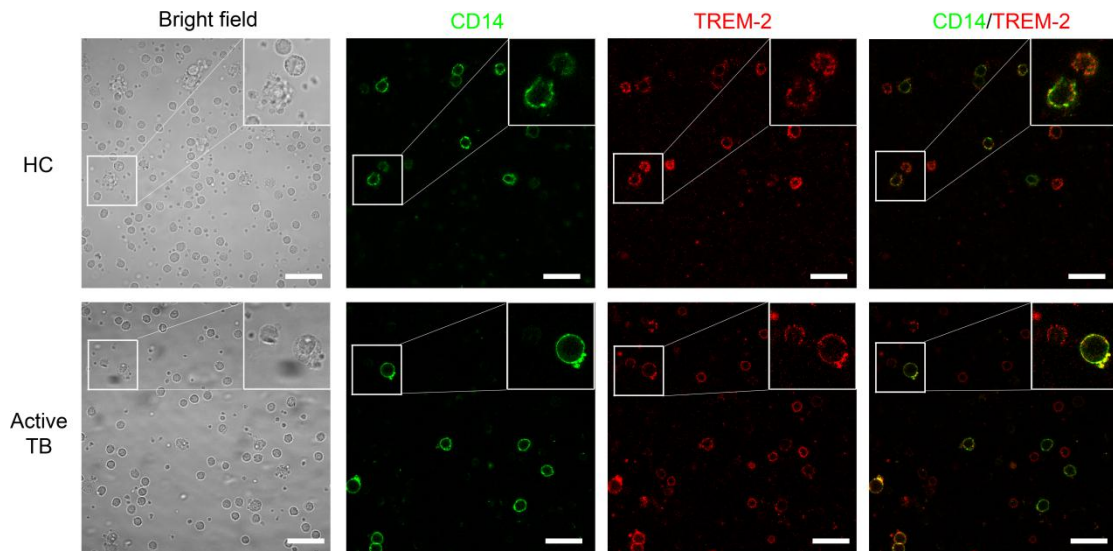

21

22

23 **Figure S2. TREM-2 expression on peripheral CD14<sup>+</sup> monocytes by confocal**  
 24 **microscopy.** PBMCs from HC or active TB patients were double stained with anti-  
 25 CD14 (Green) and anti-TREM-2 (Red) Abs, and then observed by confocal  
 26 microscopy. Scale bars, 50µm.

27

28

29

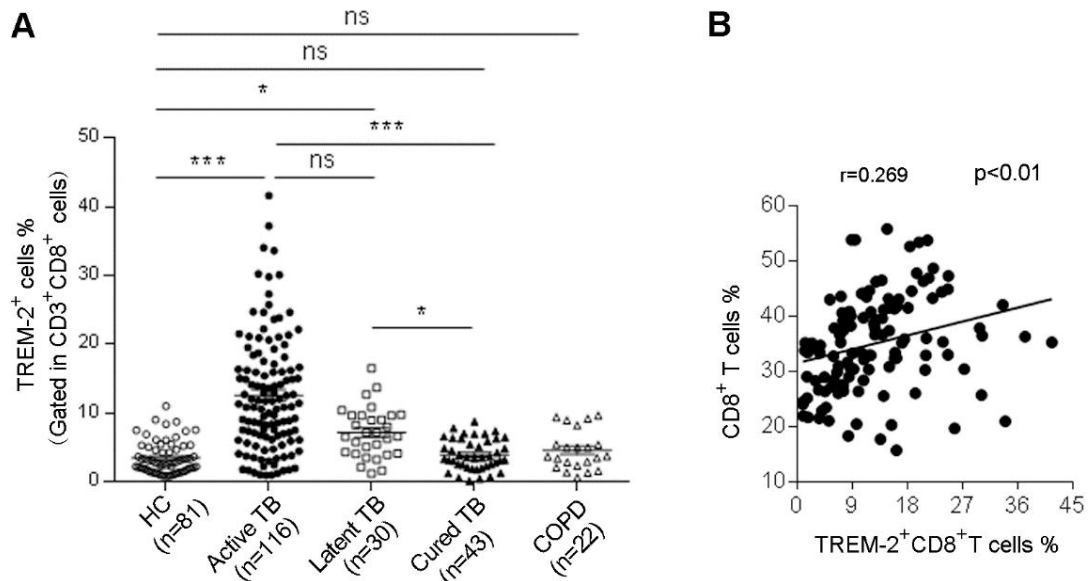

30

31 **Figure S3. The expression of TREM-2 on CD8<sup>+</sup> T cells from clinical patients. (A)**

32 The frequency of TREM-2<sup>+</sup>CD8<sup>+</sup> T cells (Gated in live CD8<sup>+</sup> T cells) were analyzed

33 in healthy donors (HC, n=81) and patients with active TB (n=116), latent TB (n=30),

34 cured TB (n=43) or COPD (n=22). (B) Correlation between the frequency of CD8<sup>+</sup> T

35 cells and TREM-2<sup>+</sup> surface expression was analyzed in active TB patients (n=116) by

36 SPSS Software. r, correlation coefficient. Data represent mean ± SD. One way

37 ANOVA test was performed in A. Spearman correlation analysis was performed to

38 analyze the correlations in B. ns, no significant difference. \**P* < 0.05. \*\*\**P* < 0.001.

39

40

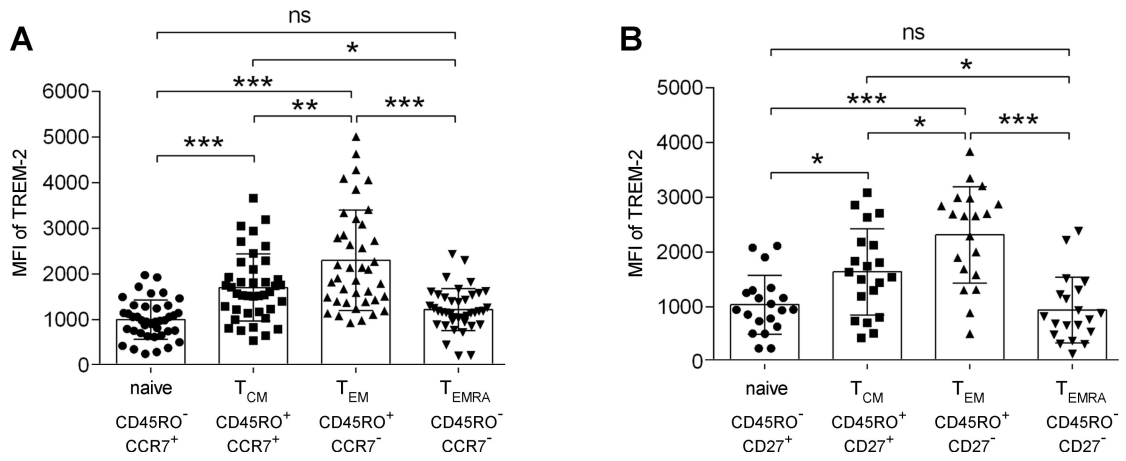

41

42

43 **Figure S4. TREM-2 is highly expressed in effector and memory T cells. (A, B)** The  
 44 mean fluorescence intensity (MFI) of TREM-2 in naive T cells, T<sub>EM</sub>, T<sub>CM</sub>, T<sub>EMRA</sub> were  
 45 analyzed by flow cytometry. Data represent mean ± SD. One-way ANOVA test was  
 46 performed in **A-B**. ns, no significant difference. \**P* < 0.05. \*\**P* < 0.01. \*\*\**P* < 0.001.

47

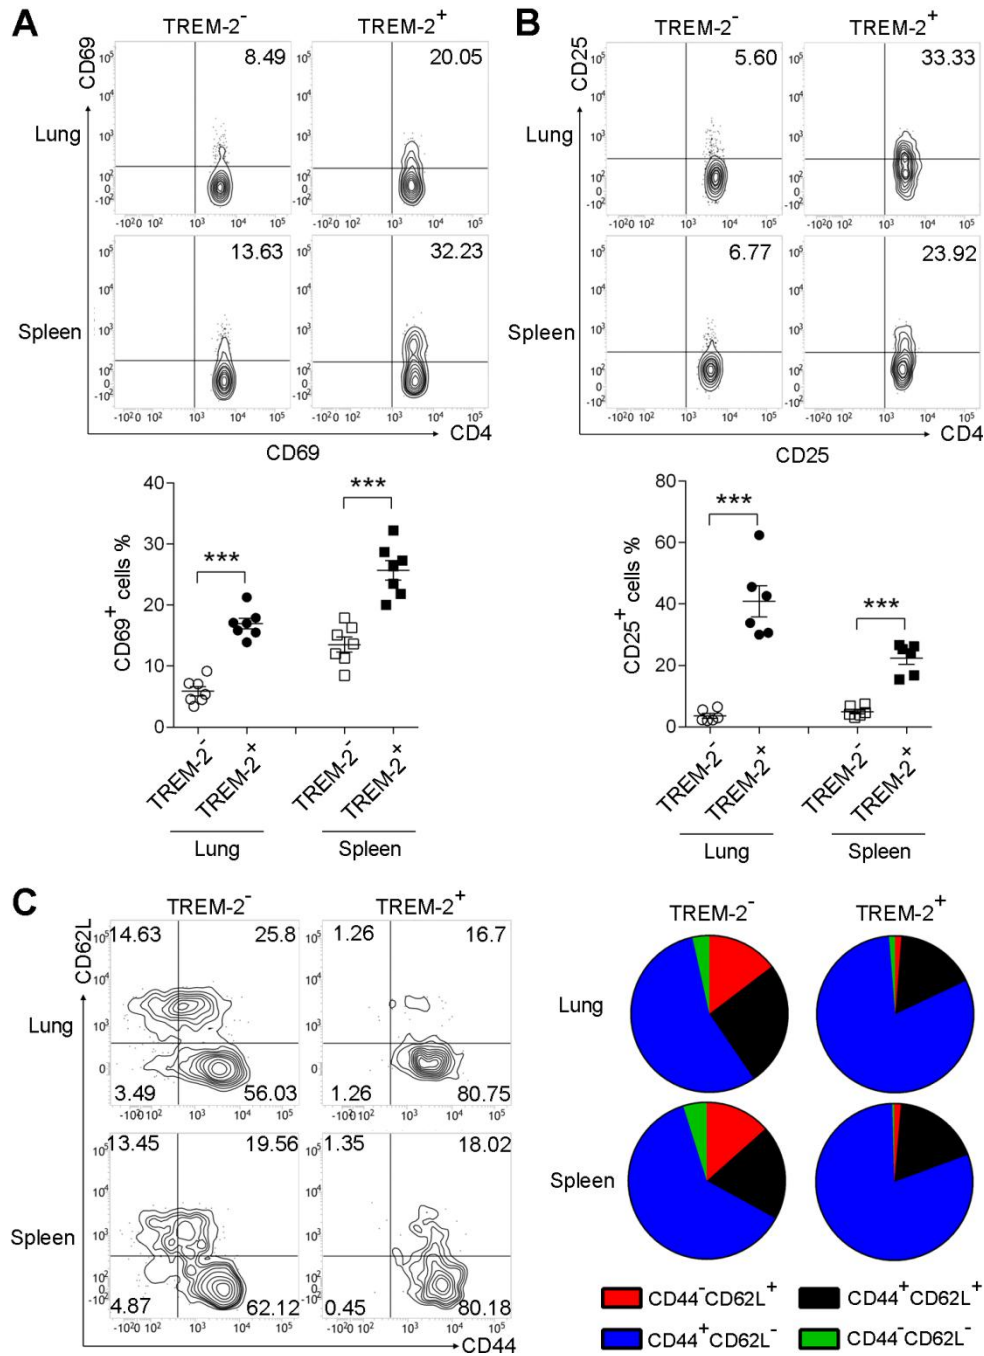

48

49 **Figure S5. TREM-2<sup>+</sup>CD4<sup>+</sup> T cells displayed activation and effector memory**  
 50 **phenotype in *Mtb*-infected mice.** C57BL/6 mice were injected i.p. with 1x10<sup>6</sup> CFU  
 51 of H37Rv. (A-B) Expressions of CD69 and CD25 in TREM-2<sup>+</sup> or TREM-2<sup>-</sup>CD4<sup>+</sup> T  
 52 cells from lungs and spleens were determined by flow cytometry. The percentages of  
 53 CD69 or CD25-positive cells were compared in TREM-2<sup>+</sup> vs TREM-2<sup>-</sup>CD4<sup>+</sup> T cells.  
 54 (C) CD4<sup>+</sup> T cells were defined by flow cytometry with CD44 and CD62L staining.

55 The percentages of naive T cells (CD44<sup>-</sup>CD62L<sup>+</sup>), T<sub>EM</sub> (CD44<sup>+</sup>CD62L<sup>-</sup>), T<sub>CM</sub>  
56 (CD44<sup>+</sup>CD62L<sup>+</sup>) and T<sub>EMRA</sub> (CD44<sup>-</sup>CD62L<sup>-</sup>) were shown as piechart in TREM-2<sup>+</sup> or  
57 TREM-2<sup>-</sup>CD4<sup>+</sup> T cells in the infected lungs or spleens. Data represent mean ± SD  
58 from at least three independent experiments. Unpaired Student's t-test was performed  
59 in **A-B**. \*\*\**P* < 0.001.  
60

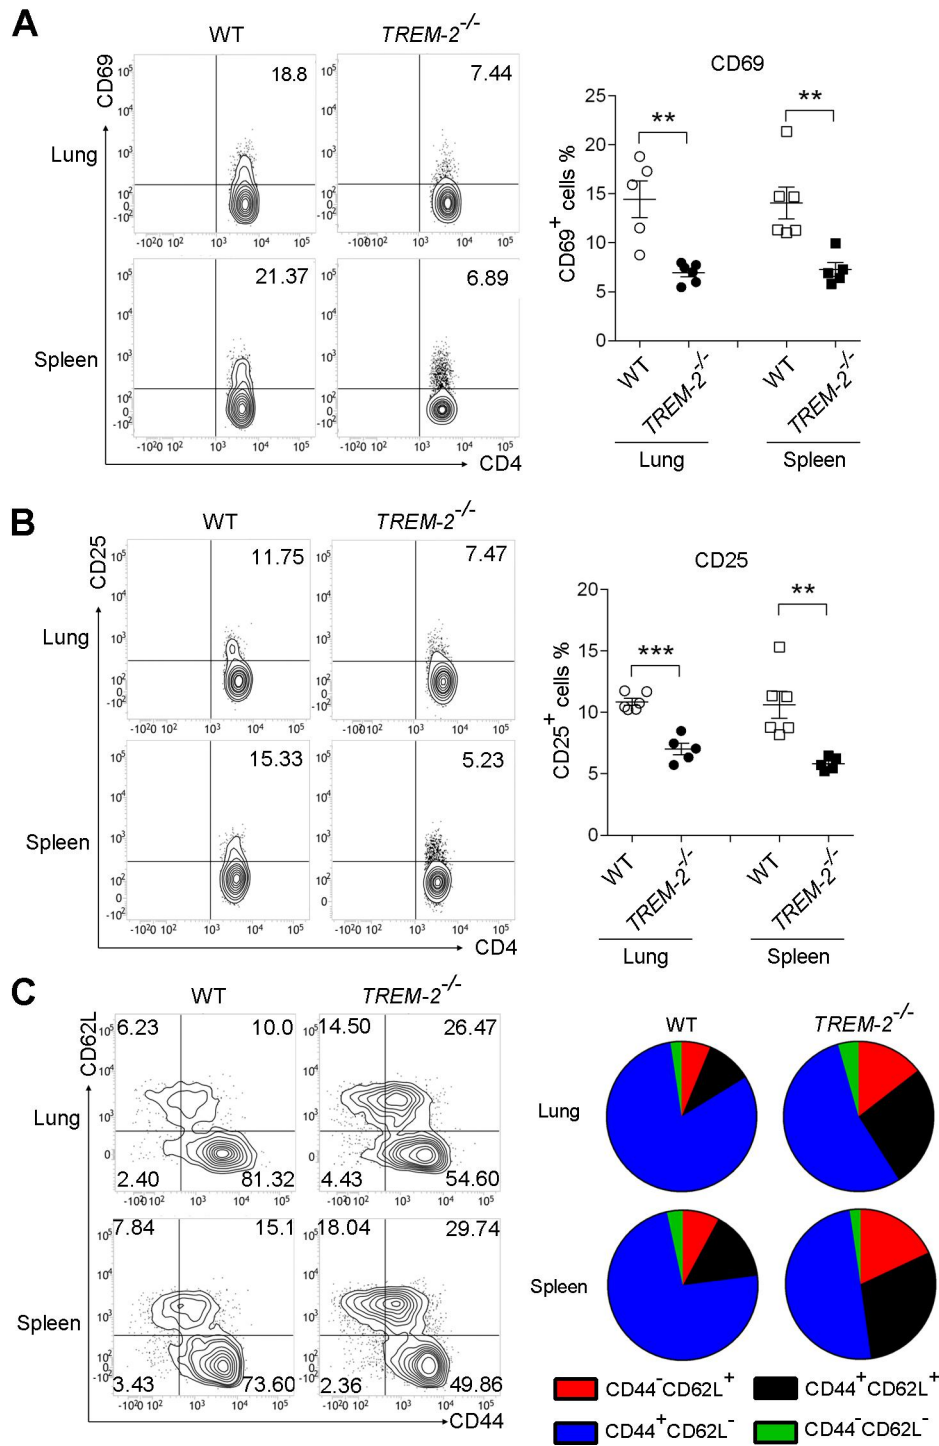



67 positive cells were compared in TREM-2<sup>+</sup> vs TREM-2<sup>-</sup>CD4<sup>+</sup> T cells. (C) CD4<sup>+</sup> T cells  
68 were defined by flow cytometry with CD44 and CD62L staining. The percentages of  
69 naive T cells (CD44<sup>-</sup>CD62L<sup>+</sup>), T<sub>EM</sub> (CD44<sup>+</sup>CD62L<sup>-</sup>), T<sub>CM</sub> (CD44<sup>+</sup>CD62L<sup>+</sup>) and T<sub>EMRA</sub>  
70 (CD44<sup>-</sup>CD62L<sup>-</sup>) were shown as piechart in WT or *TREM-2*<sup>-/-</sup> CD4<sup>+</sup> T cells. Data  
71 represent mean ± SD from at least three independent experiments. Unpaired Student's  
72 t-test was performed in **A-B**. \*\**P* < 0.01. \*\*\**P* < 0.001.  
73

74

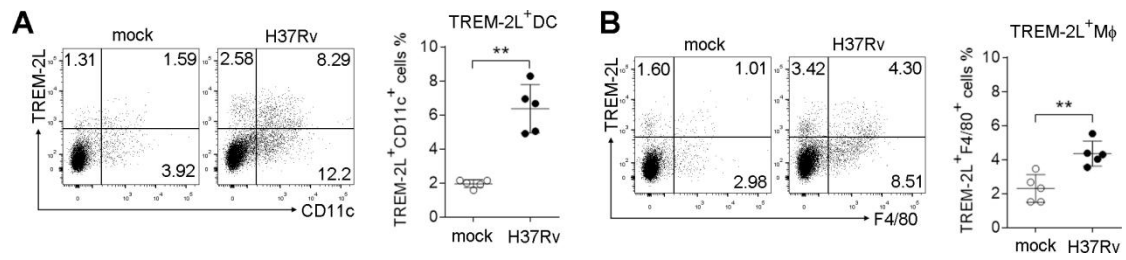

75

76

77 **Figure S7. TREM-2L expression in Mφ and DC was increased after *Mtb* infection.**

78 (A, B) The frequency of TREM-2L on splenic F4/80<sup>+</sup> Mφ and CD11c<sup>+</sup> DC in

79 uninfected and infected mice was detected by flow cytometry. Data represent mean ±

80 SD from at least three independent experiments. Unpaired Student's t-test was

81 performed in A-B. \*\**P* < 0.01.

82

83

84

85

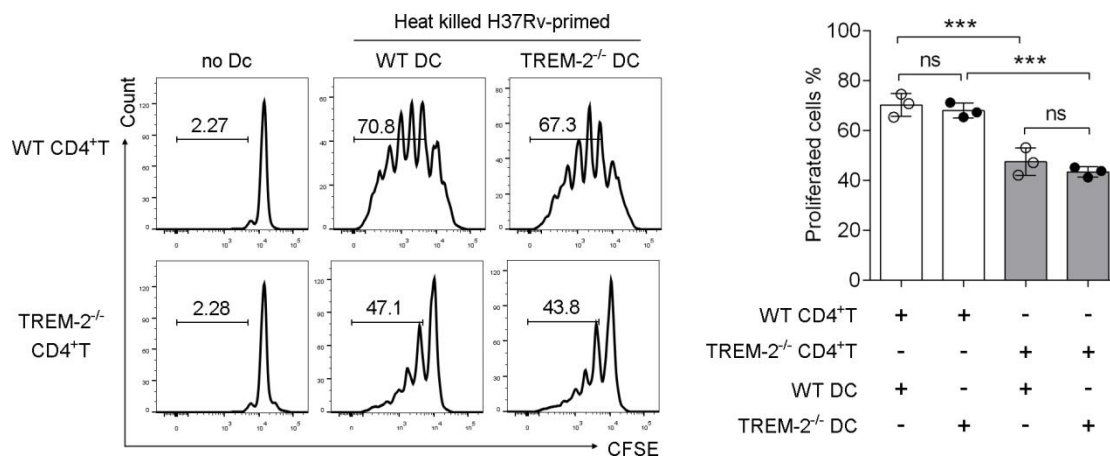

86

87 **Figure S8. TREM-2 deficiency in DCs did not affect CD4<sup>+</sup> T cell proliferation in**  
 88 **vitro.** Splenic T cells sorted from WT or *TREM-2*<sup>-/-</sup> mice (n=3) were labeled with  
 89 CFSE, and then co-cultured with heat-killed H37Rv-primed WT or *TREM-2*<sup>-/-</sup> DCs at  
 90 a ratio of 5:1 for 5 days, respectively. Cell proliferations of WT or *TREM-2*<sup>-/-</sup> CD4<sup>+</sup> T  
 91 cells were examined by flow cytometry. Data represent mean ± SD from at least three  
 92 independent experiments. One way ANOVA test was performed. ns, no significant  
 93 difference. \*\*\**P* < 0.001.

94

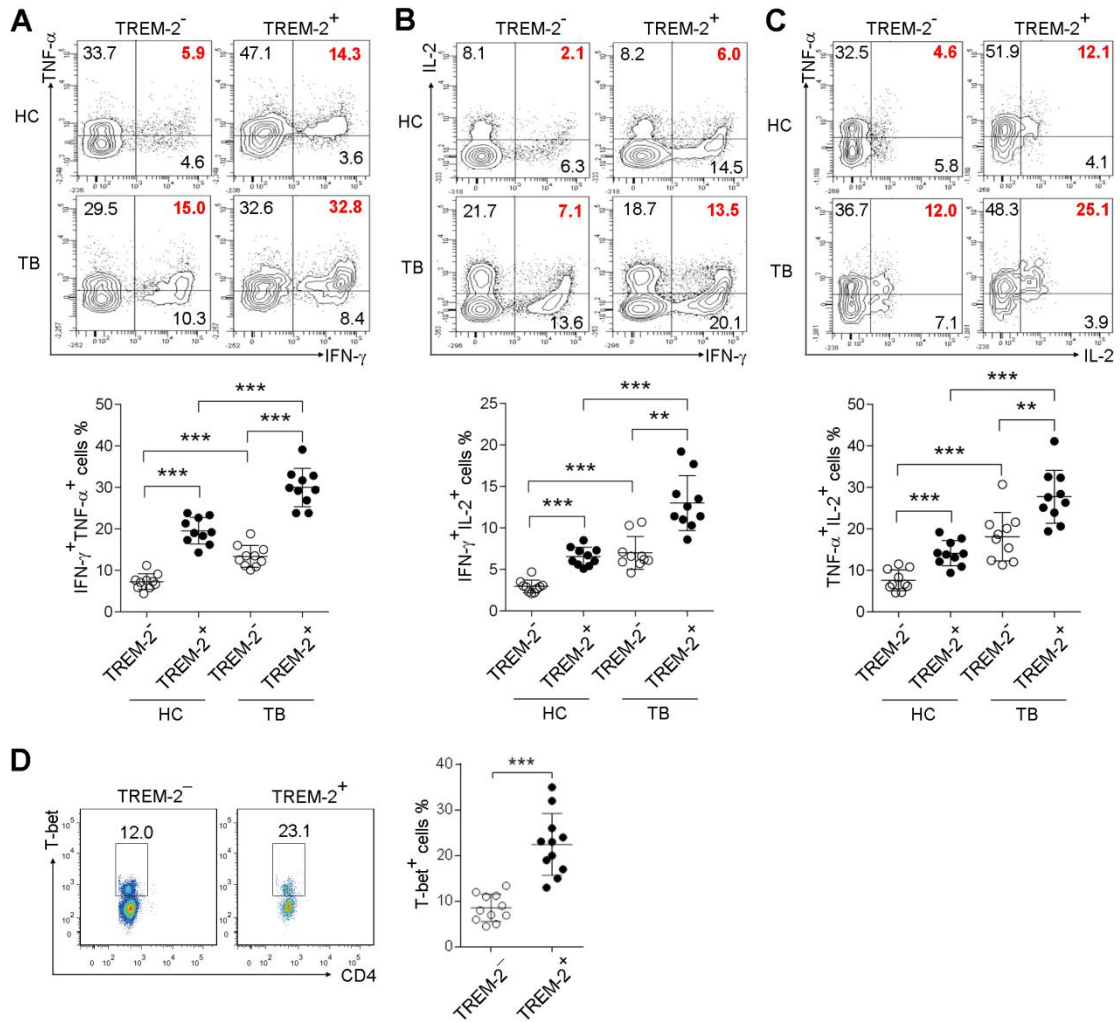

95

96 **Figure S9. TREM-2 promoted Th1 cytokine production in peripheral CD4<sup>+</sup> T**  
 97 **cells of active TB patients.** PBMCs from HC (n=9) and active TB patients (n=10)  
 98 were stimulated with anti-CD3/CD28 (1μg/ml) and BFA (10μg/ml) for 12 hours. The  
 99 percentages of IFN-γ<sup>+</sup>TNF-α<sup>+</sup> (A), IFN-γ<sup>+</sup>IL-2<sup>+</sup> (B) and TNF-α<sup>+</sup>IL-2<sup>+</sup> (C) cells were  
 100 analyzed by flow cytometry. (D) PBMCs from active TB subjects (n=12) were stained  
 101 with specific Abs against CD3, CD4, TREM-2 or T-bet, followed by flow cytometry  
 102 analysis. The percentages of T-bet positive cells were shown in TREM-2<sup>+</sup> vs TREM-2<sup>-</sup>  
 103 CD4<sup>+</sup> T cells. Data represent mean ± SD from at least three independent experiments.  
 104 One way ANOVA test was performed in A-C. Unpaired Student's t-test was  
 105 performed in D. \*\*P < 0.01. \*\*\*P < 0.001.

106

107

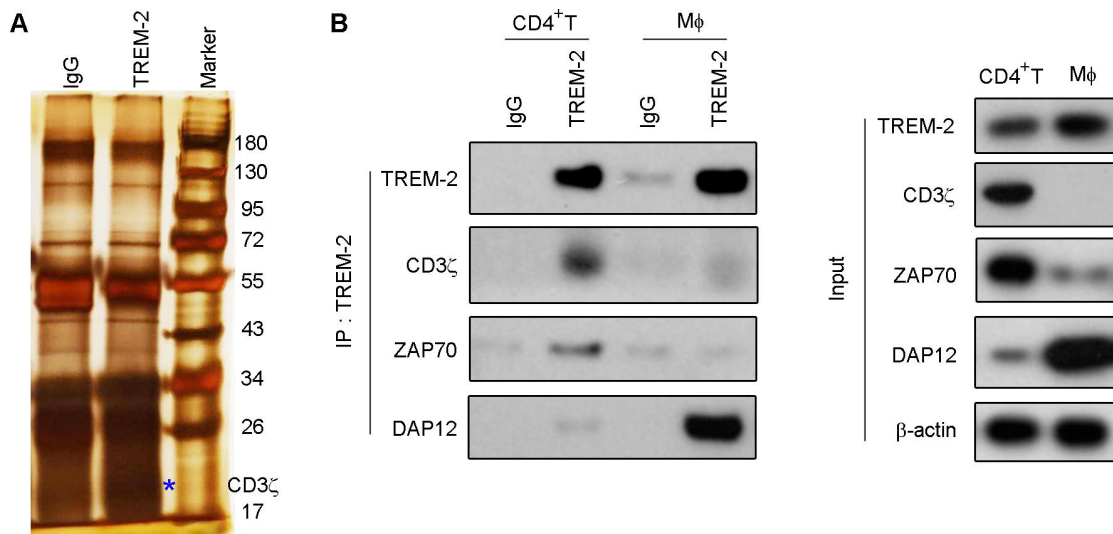

108

109 **Figure S10. Identified proteins interacted with TREM-2 in CD4<sup>+</sup> T cells.** (A)  
110 Primary CD4<sup>+</sup> T cells were sorted from C57BL/6 mice and then cell lysate protein  
111 was respectively immunoprecipitated with anti-TREM-2 Ab or isotype-matched IgG.  
112 Immunoprecipitates were analyzed by silver staining and the band as pointed with  
113 asterisk (17-26kDa) was cut and examined by liquid chromatography- mass  
114 spectrometry (LC-MS). The results indicated CD3 $\zeta$  as the most potential protein. (B)  
115 Sorted CD4<sup>+</sup> T cells or F4/80<sup>+</sup> macrophages were treated with anti-CD3 mAb (1 $\mu$ g/ml)  
116 or LPS (1 $\mu$ g/ml) for 30 min respectively. Cell lysates (input) and anti-TREM-2  
117 immunoprecipitates were analyzed for TREM-2, CD3 $\zeta$ , DAP12 and ZAP70.  
118 Immunoprecipitates performed with isotype-matched control IgG were used as  
119 negative control.

120

121

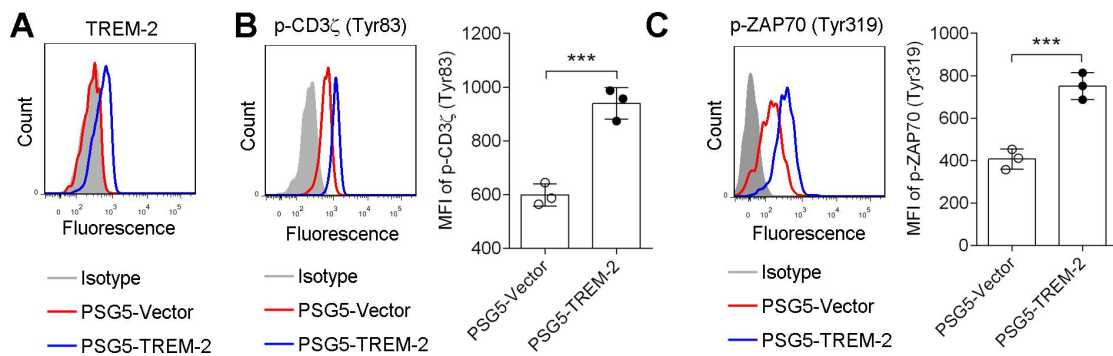

122

123 **Figure S11. TREM-2 promoted phosphorylation of CD3 $\zeta$  and ZAP70 in Jurkat**  
124 **cells. (A)** 293T cells were transfected with HA-tagged TREM-2 plasmids. Surface  
125 TREM-2 expression was determined by flow cytometry. **(B, C)** Jurkat cells (n=3)  
126 were transfected with or PSG5 vector vs human TREM-2-expressing plasmids for 24  
127 hours, and then treated with anti-CD3 mAb (1 $\mu$ g/ml). TREM-2, phosphorylated CD3 $\zeta$   
128 and ZAP70 were analyzed by flow cytometry. Data represent mean  $\pm$  SD from at least  
129 three independent experiments. Unpaired Student's t-test was performed in **D**.\*\*\* $P <$   
130 0.001.

131

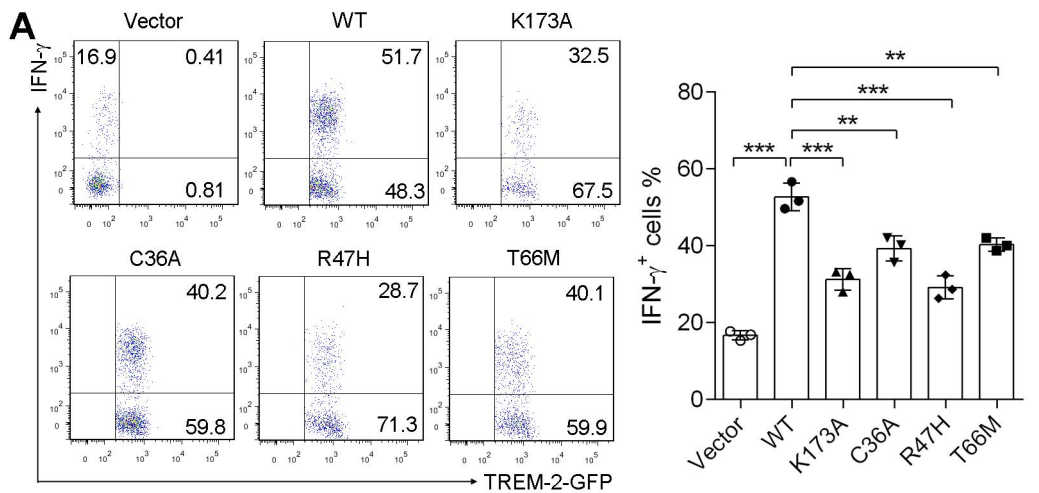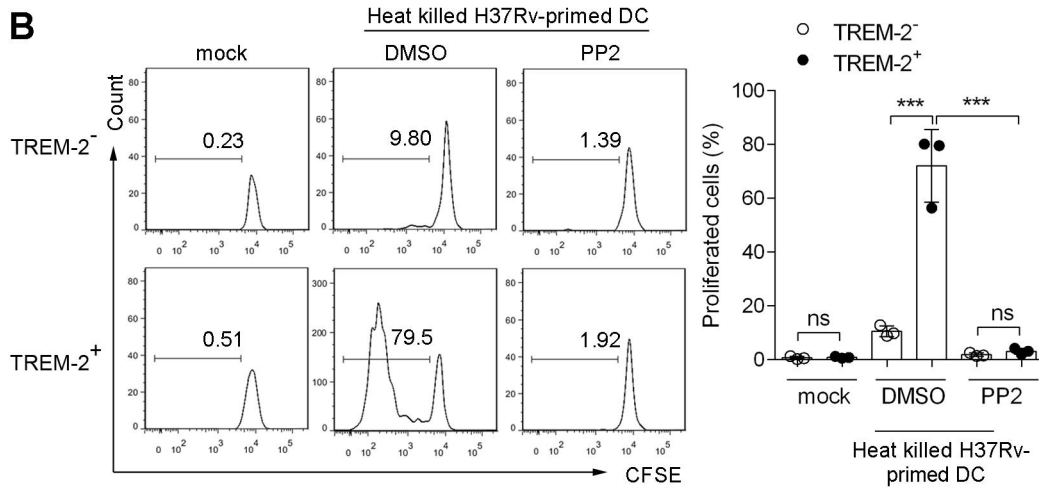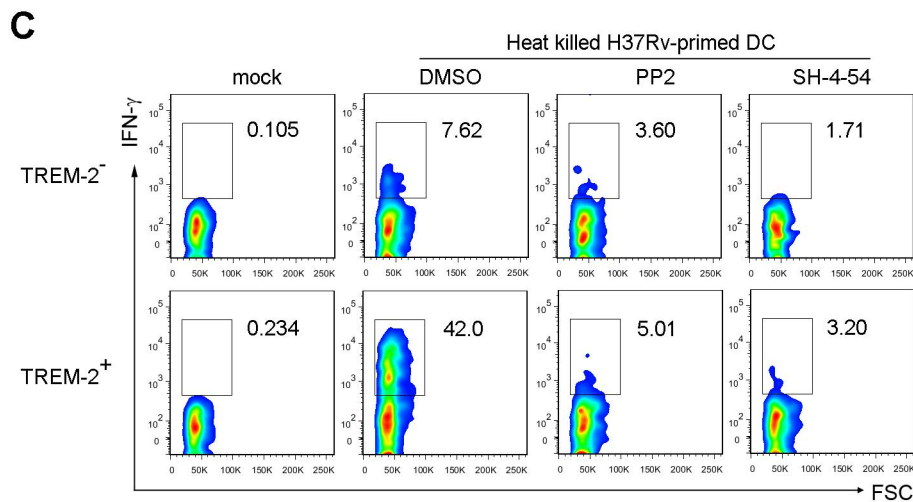

134 **Figure S12. TREM-2/ZAP70/STATs signaling was required in CD4<sup>+</sup> T cell**  
 135 **proliferation and IFN- $\gamma$  production. (A)** Sorted CD4<sup>+</sup> T cells (n=3) were transfected

136 with mutant TREM-2-GFP plasmid, and then stimulated with anti-CD3/CD28  
137 (1 $\mu$ g/ml), IFN- $\gamma$  (10ng/ml) and IL-12 (10ng/ml). IFN- $\gamma$  production and GFP  
138 expression was determined by flow cytometry. Bar chart showed the frequency of  
139 IFN- $\gamma$  positive cells (gated in GFP<sup>+</sup>CD4<sup>+</sup> T cells). (**B, C**) TREM-2<sup>+</sup> or TREM-2<sup>-</sup>CD4<sup>+</sup>  
140 T cells sorted from human PBMCs (n=3) were pretreated with PP2 (1 $\mu$ M) or SH-4-54  
141 (1 $\mu$ M), and then coculture with heat killed H37Rv-primed DCs. Cell proliferation (**B**)  
142 and IFN- $\gamma$  production (**C**) was determined by flow cytometry. Data represent mean  $\pm$   
143 SD from at least three independent experiments. One way ANOVA test was performed  
144 in **A-B**. ns, no significant; \* $P < 0.05$ , \*\*\* $P < 0.001$ .

145



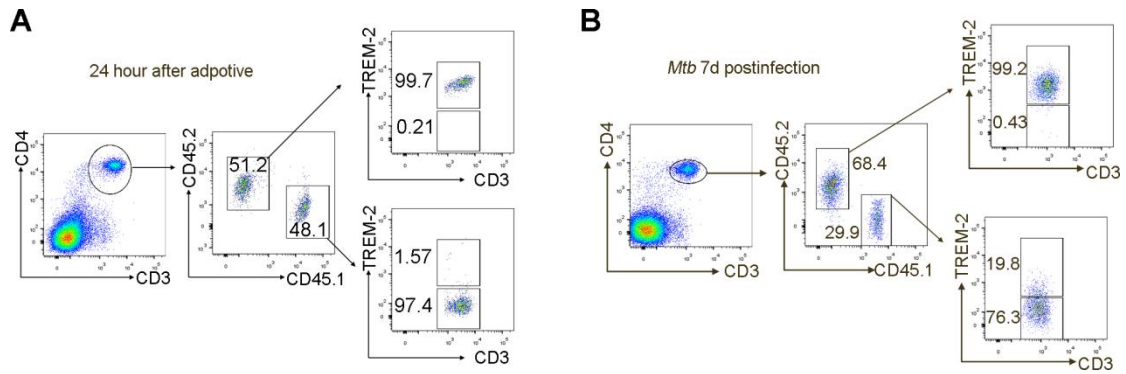

146

147 **Figure S13. TREM-2 expression stability in CD4<sup>+</sup>T cells after transfer to *Rag2*<sup>-/-</sup>**  
 148 **mice.** TREM-2<sup>-</sup> or TREM-2<sup>+</sup>CD4<sup>+</sup> T cells were sorted from spleen cells from CD45.1  
 149 or CD45.2 transgenic mice. TREM-2<sup>-</sup>CD45.1<sup>+</sup> and TREM-2<sup>+</sup>CD45.2<sup>+</sup> CD4<sup>+</sup> T cells  
 150 were co-transferred into *Rag2*<sup>-/-</sup> mice at 1:1 ratio. Recipient *Rag2*<sup>-/-</sup> mice were infected  
 151 with *Mtb* at 24 hours after T cell transfer. TREM-2 expression was determined in  
 152 transferred CD45.1<sup>+</sup> and CD45.2<sup>+</sup>CD4<sup>+</sup> T cells at 24 hours after adoptive transfer (**A**)  
 153 and Day 7 p.i. (**B**).

154

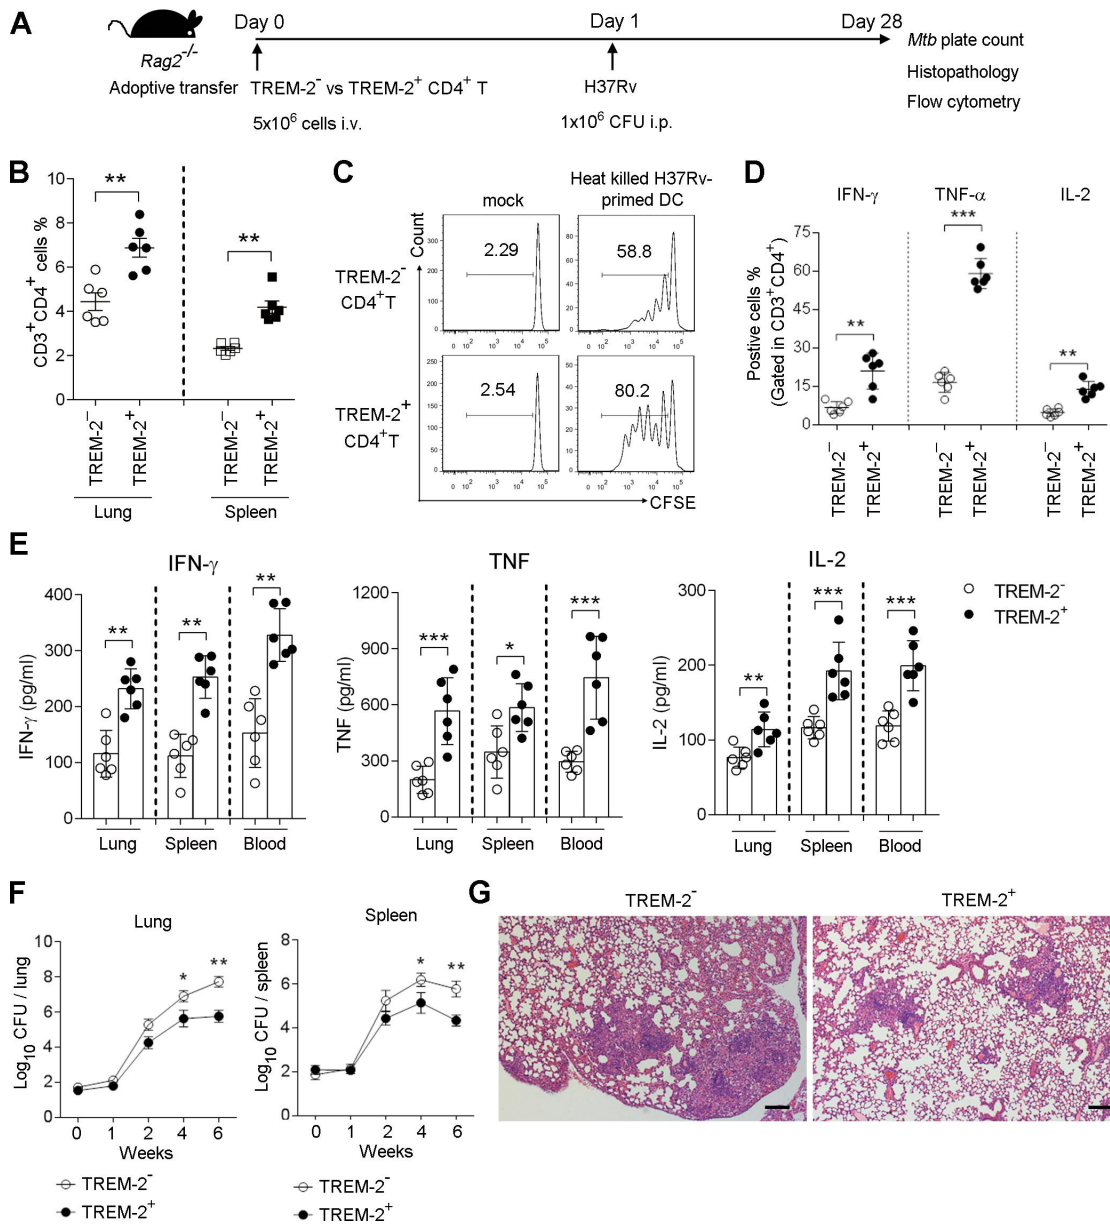

156

157 **Figure S14. TREM-2 enhanced pro-inflammatory Th1 responses against *Mtb***  
 158 **infection in vivo.** (A) *Rag2*<sup>-/-</sup> mice (n=6) were injected i.v. with 5 x 10<sup>6</sup> with TREM-  
 159 2<sup>-</sup> vs TREM-2<sup>+</sup>CD4<sup>+</sup> T cells, following by injection i.p. with 1x10<sup>6</sup> CFU of H37Rv. At  
 160 28 days p.i., the lungs and spleens were collected and analyzed for the following tests.  
 161 (B) The frequency of pulmonary and splenic CD4<sup>+</sup> T cells was determined by flow  
 162 cytometry. (C) CFSE-labeled TREM-2<sup>+</sup> or TREM-2<sup>-</sup>CD4<sup>+</sup> T cells from active TB  
 163 patients were stimulated with heat killed H37Rv-primed DC, anti-CD3/CD28 (1µg/ml)

164 for 3 days, and then cell proliferation was examined by flow cytometry. **(D)**  
165 Splenocytes were stimulated with PMA (50nM), ionomycin (1µg/ml) and BFA  
166 (1µg/ml) for 6 hours. Percentages of IFN-γ , TNF and IL-2-producing cells in TREM-  
167 2<sup>-</sup> vs TREM-2<sup>+</sup> CD4<sup>+</sup> T cells were analyzed by flow cytometry. **(E)** Concentrations of  
168 IFN-γ, TNF and IL-2 in the lungs, spleens and peripheral blood were determined by  
169 ELISA. **(F)** Bacteria burden in the lungs was determined by plate count and  
170 calculated as colony-forming units (CFU) per lung or spleen. **(G)** Lung sections were  
171 stained with hematoxylin-eosin (H&E) and checked for histopathology under  
172 microscope. Data represent mean ± SD from at least three independent experiments.  
173 Unpaired Student's t-test was performed in **B-F**. \*\* $P < 0.01$ . \*\*\* $P < 0.001$ .  
174

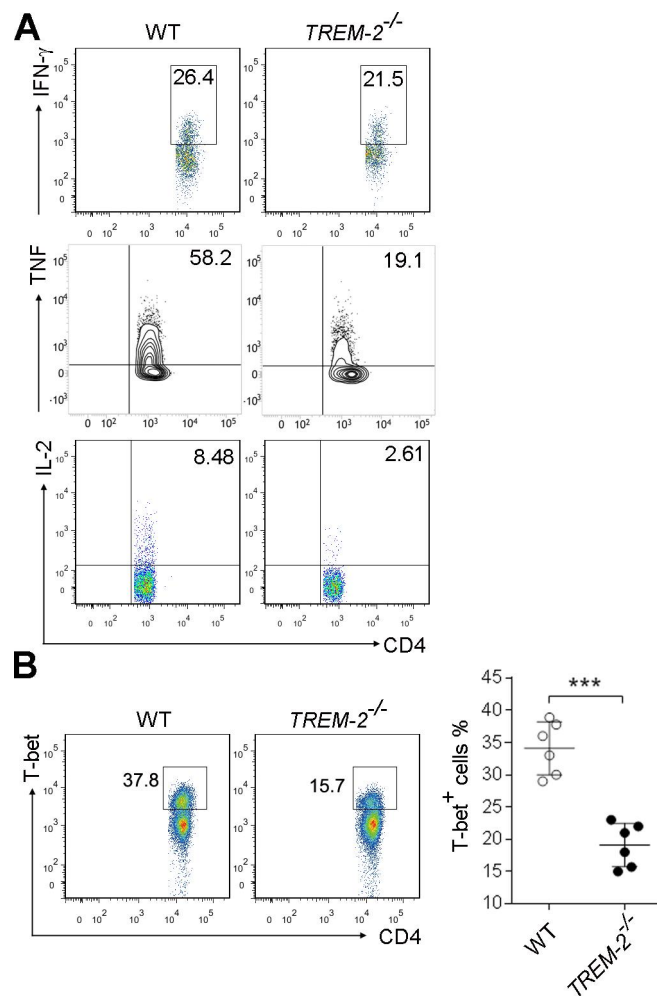

176

177 **Figure S15. TREM-2 enhanced Th1 cytokine and T-bet expression in CD4<sup>+</sup> T cell**  
 178 **in vivo.** (A) Splenocytes were stimulated with PMA (50nM), ionomycin (1 $\mu$ g/ml) and  
 179 BFA (1 $\mu$ g/ml) for 6 hours. Percentages of IFN- $\gamma$ , TNF and IL-2-producing cells in  
 180 WT vs *TREM-2*<sup>-/-</sup> were analyzed by flow cytometry. (B) Percentages of T-bet<sup>+</sup> cells in  
 181 WT vs *TREM-2*<sup>-/-</sup> CD4<sup>+</sup> T cells (n=6) were detected by flow cytometry. Data represent  
 182 mean  $\pm$  SD from at least three independent experiments. Unpaired Student's t - test  
 183 was performed in B. \*\*\*P < 0.001.

184

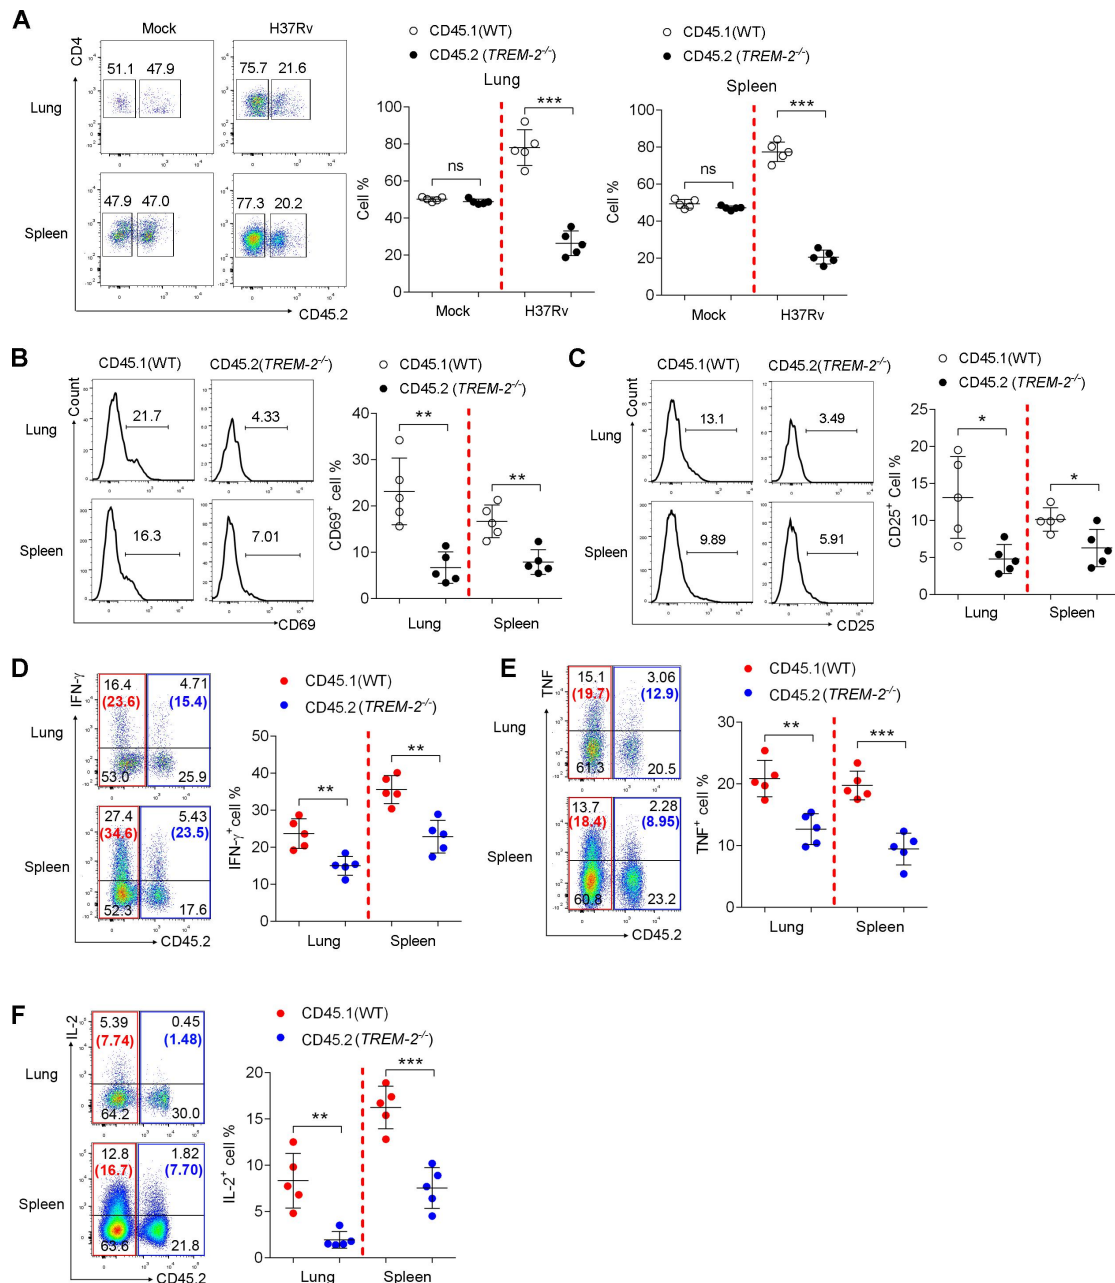

185

186 **Figure S16. TREM-2 knockout reduced Th1 responses in bone marrow chimeric**

187 **mice during *Mtb* infection.** Irradiated *Rag2*<sup>-/-</sup> mice (n=5) were reconstituted with

188 CD45.1<sup>+</sup> WT and CD45.2<sup>+</sup> *TREM-2*<sup>-/-</sup> BM cells at ratio of 1:1. Reconstituted mice

189 were infected i.v. with H37Rv, and lung and spleen cells were analyzed at Day 28 p.i..

190 (A) The frequencies of CD45.1<sup>+</sup> and CD45.2<sup>+</sup> T cells (gated in CD3<sup>+</sup>CD4<sup>+</sup> T cells)

191 were determined by flow cytometry. (B, C) Expressions of CD69 (B) and CD25 (C)

192 were determined by flow cytometry in CD45.1<sup>+</sup> or CD45.2<sup>+</sup>CD4<sup>+</sup> T cells. (D-F) Cells

193 were stimulated with PMA, ionomycin and BFA for 6 hours. Percentages of IFN- $\gamma$ ,

194 TNF and IL-2-producing cells in CD45.1<sup>+</sup> or CD45.2<sup>+</sup>CD4<sup>+</sup> T cells were analyzed by  
195 flow cytometry. Data represent mean  $\pm$  SD from at least three independent  
196 experiments. Unpaired Student's t-test was performed in **A-F**. ns, no significant  
197 difference. \* $P < 0.05$ , \*\* $P < 0.01$ , \*\*\* $P < 0.001$ .  
198

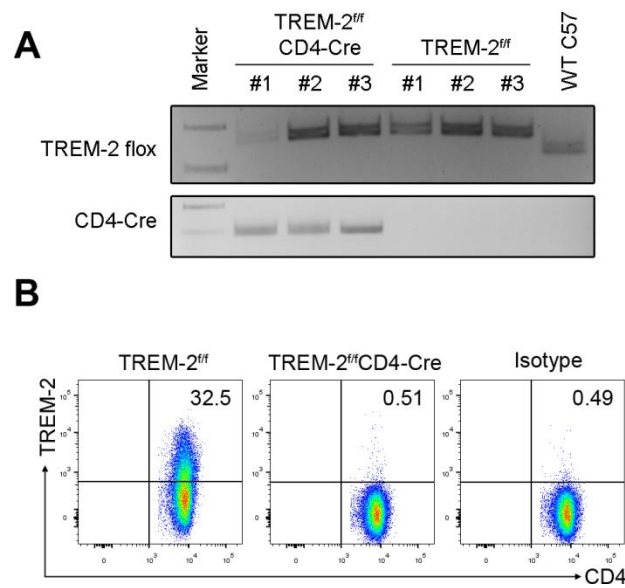

200

201 **Figure S17. Generation of CD4 specific TREM-2 knockout mice.**

202 Mice with loxP-flanked alleles of TREM-2 exon 2/3 (TREM-2<sup>fl/fl</sup>) were crossed with  
 203 mice expressing Cre recombinase under the control of a CD4 promoter (CD4-Cre) to  
 204 achieve CD4-specific deletion of TREM-2 (TREM-2<sup>fl/fl</sup>CD4-Cre). (A) PCR analysis of  
 205 TREM-2 with loxP-flanked alleles and CD4-Cre recombinase from extracted DNA.  
 206 (B) Flow cytometry analysis of TREM-2 protein expression in spleen CD4<sup>+</sup>T cell  
 207 from TREM-2<sup>fl/fl</sup> or TREM-2<sup>fl/fl</sup>CD4-Cre mice.

208

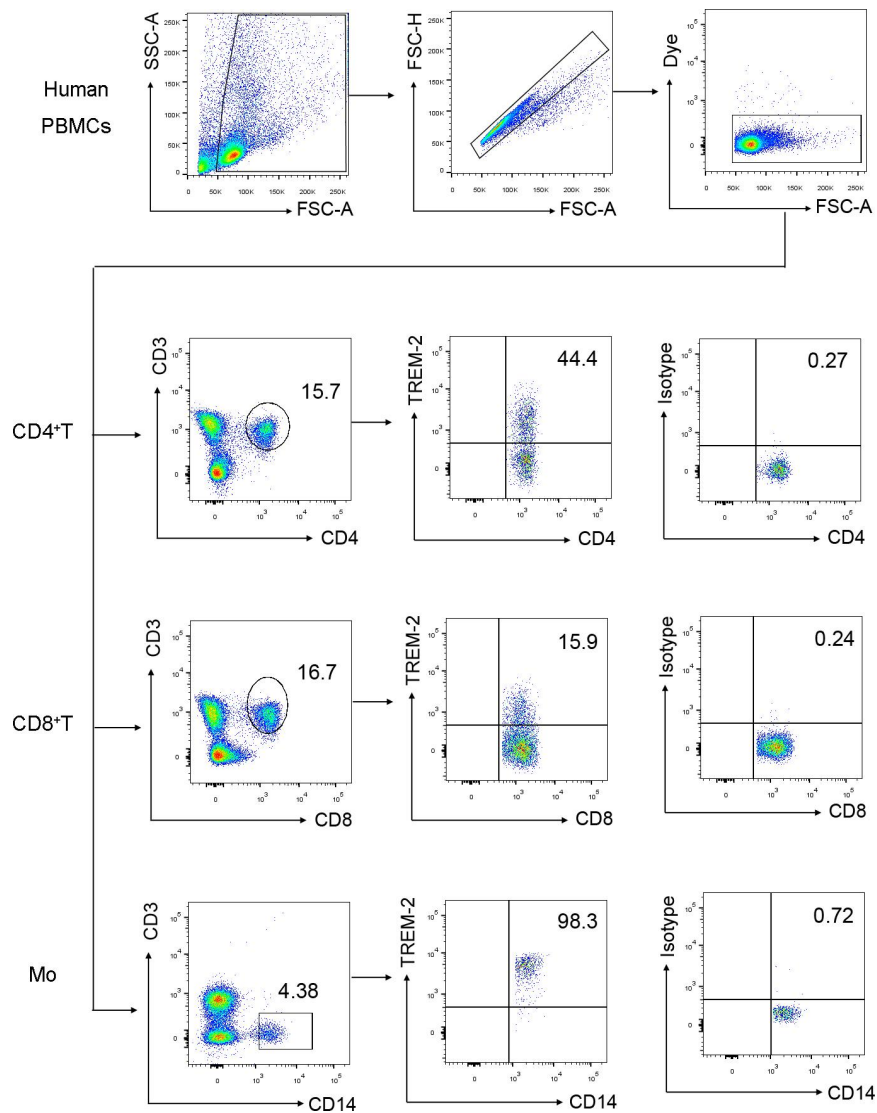

209

210 **Figure S18. Gating strategy used to determine TREM-2 expression on**  
 211 **populations in human PBMCs.** Cells were gated as single, live (Viability dye<sup>-</sup>) cells.  
 212 CD4<sup>+</sup> T cells, CD8<sup>+</sup>T cells and monocytes (Mo) were gated as CD3<sup>+</sup>CD4<sup>+</sup>, CD3<sup>+</sup>CD8<sup>+</sup>  
 213 and CD3<sup>-</sup>CD14<sup>+</sup> cells, respectively. TREM-2 Ab and IgG isotype were used to set the  
 214 cutoff value of TREM-2<sup>+</sup> cells and TREM-2<sup>-</sup> cells.



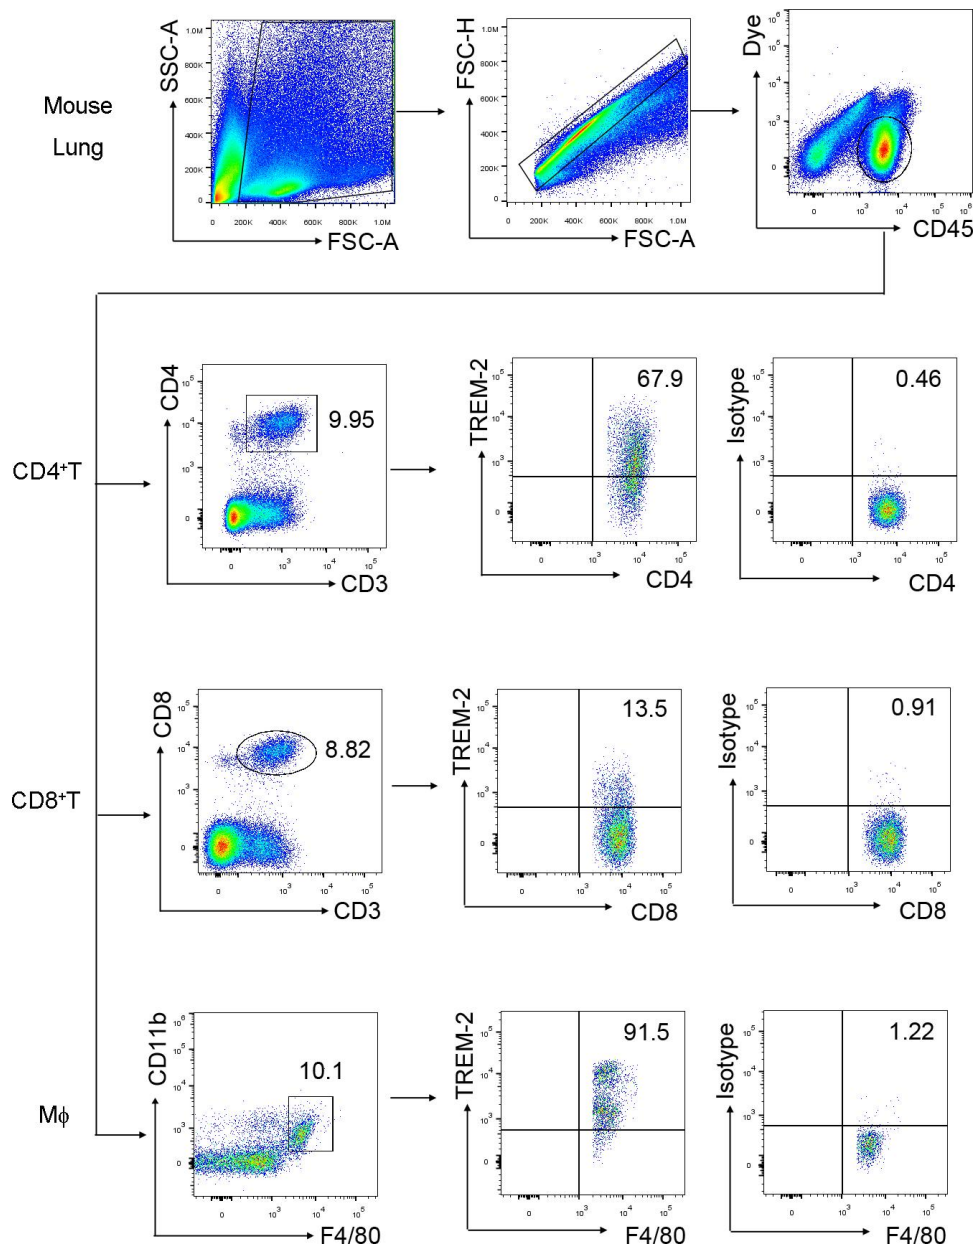

215

216 **Figure S19. Gating strategy used to determine TREM-2 expression on**

217 **populations in mouse lung sample.** Cells were gated as single, live (viability dye<sup>-</sup>)

218 cells. CD4<sup>+</sup> T cells, CD8<sup>+</sup> T cells and macrophage (Mφ) were gated as CD3<sup>+</sup>CD4<sup>+</sup>,

219 CD3<sup>+</sup>CD8<sup>+</sup> and CD11b<sup>+</sup>F4/80<sup>+</sup> cells, respectively. TREM-2 Ab and IgG isotype were

220 used to set the cutoff value of TREM-2<sup>+</sup> cells and TREM-2<sup>-</sup> cells.

221

222

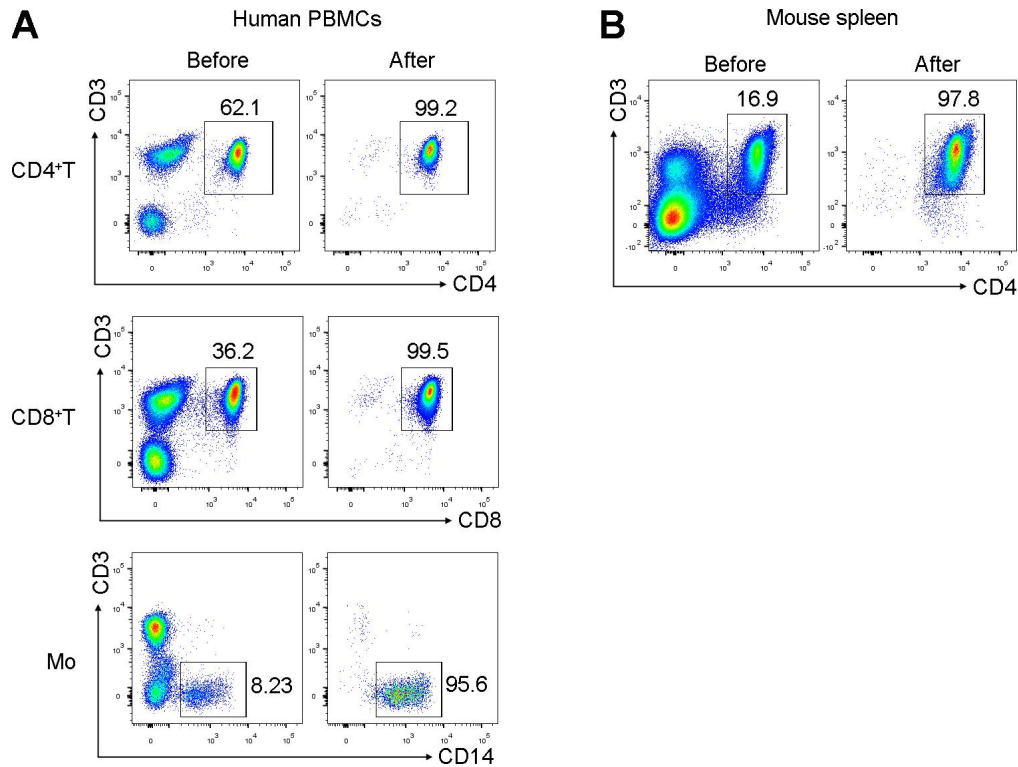

223

224

225 **Figure S20. The purity of sorted cells.** (A) Human CD4<sup>+</sup> T cells, CD8<sup>+</sup> T cells and  
 226 monocytes (Mo) were sorted from human PBMCs by positive selection using the  
 227 magnetic cell sorting system. The purity of the above subpopulations was analyzed by  
 228 gating on CD3<sup>+</sup>CD4<sup>+</sup>, CD3<sup>+</sup>CD8<sup>+</sup> or CD3<sup>-</sup>CD14<sup>+</sup> before and after sorting. (B) Mouse  
 229 CD4<sup>+</sup> T cells were sorted from mouse spleen by positive selection using the magnetic  
 230 cell sorting system. The purity of mouse CD4<sup>+</sup> T cells was analyzed by gating on  
 231 CD3<sup>+</sup>CD4<sup>+</sup> before and after sorting.

232

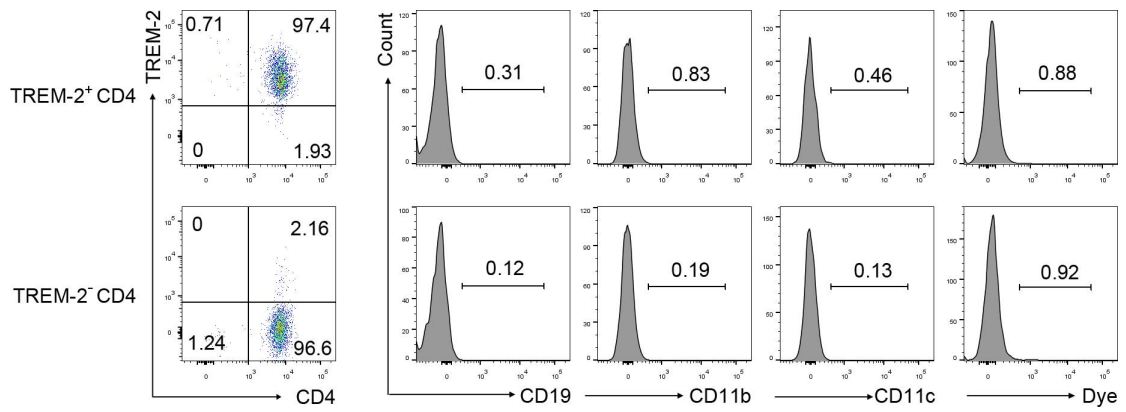

233

234

**Figure S21. The purity of TREM-2<sup>-</sup> and TREM-2<sup>+</sup> CD4<sup>+</sup>T cells.** The sorted

235

TREM-2<sup>+</sup> or TREM-2<sup>-</sup>CD4<sup>+</sup> T cells were analyzed using flow cytometry by staining

236

with T cell marker CD4, B cell marker CD19, myeloid cell marker CD11b, dendritic

237

cell marker CD11c and viability dye.

238

239

240

241

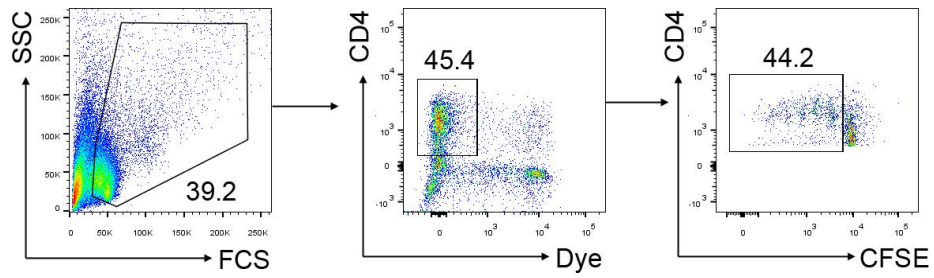

242

243 **Figure S22. Gating strategy of CFSE proliferation array.** Cells from T cell/DC co-  
244 culture system were collected and examined by flow cytometry. Proliferated T cells  
245 were gated as live (viability dye<sup>-</sup>) CD4<sup>+</sup> cells. The proliferation of divided CD4<sup>+</sup> T cells  
246 was analyzed by CFSE.

247

248

249

**Supplemental Table 1. Summary of clinical features and laboratory results of**

250

**patients**

|                | <b>HC</b>   | <b>Active TB</b> | <b>Latent TB</b> | <b>Cured TB</b> | <b>COPD</b> |
|----------------|-------------|------------------|------------------|-----------------|-------------|
| Number         | 81          | 116              | 30               | 43              | 22          |
| Age (years)    | 38.1(±2.38) | 40.4(±5.16)      | 36.2(±3.36)      | 37.7(±4.43)     | 45.6(±5.23) |
| Sex (M/F)      | 30/51       | 45/71            | 12/18            | 18/25           | 12/10       |
| Symptom        |             |                  |                  |                 |             |
| Fever          | NA          | 88(75.9%)        | NA               | NA              | 0(0%)       |
| Cough          | NA          | 77(66.4%)        | NA               | NA              | 22(100%)    |
| Weakness       | NA          | 34(29.3%)        | NA               | NA              | 20(90.9%)   |
| Rhinorrhea     | NA          | 19(16.4%)        | NA               | NA              | 17(77.3%)   |
| Chest pain     | NA          | 13(11.2%)        | NA               | NA              | 18(81.8%)   |
| Sputum smear   | NA          | 116(100%)        | 0(0%)            | 0(0%)           | 0(0%)       |
| Sputum culture | NA          | 116(100%)        | NA               | NA              | NA          |
| TST            | 0(0%)       | 116(100%)        | 30(100%)         | 30(100%)        | 0(0%)       |
| T-SPOT.TB      | 0(0%)       | 116(100%)        | 30(100%)         | 30(100%)        | 0(0%)       |
| FEV1           | NA          | NA               | NA               | NA              | 51.8(±4.0)  |
| FEV1/FVC       | NA          | NA               | NA               | NA              | 46.2(±2.5)  |

251

F, Female; M, male; NA, not applicable; TST, tuberculin skin testing; T-SPOT.TB

252

Tuberculosis antigen T-cell enzyme-linked immunospot assay; FEV1, forced expiratory

253

volume in one second; FVC, forced vital capacity. Data were shown by mean ± SEM.

254

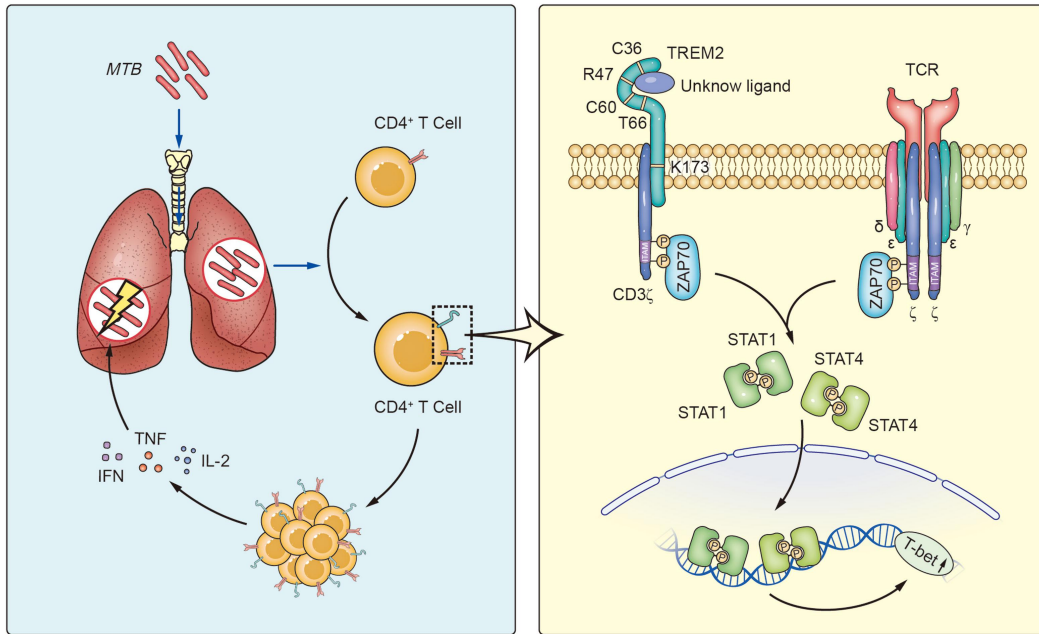

255

256 **Graphical abstract.** *Mtb* infection induces TREM-2 expression on the surface of  
 257 CD4<sup>+</sup> T cells. After the ligation with unknown ligand, TREM-2 interacts with  
 258 CD3ζ/ZAP70 complex by its transmembrane domain via K173 site. TREM-2 signals  
 259 through CD3ζ/ZAP70 complex to induce downstream STAT1/4 activation and T-bet  
 260 transcription, which is largely dependent on the amino acid sites C36, R47, C60, T66  
 261 and K173 located in the extracellular ligand-binding domain and transmembrane  
 262 domain respectively. Activation of TREM-2/CD3ζ/ZAP70 signaling subsequently  
 263 evokes CD4<sup>+</sup> T cell proliferation and Th1 differentiation. Activated Th1 cells are  
 264 recruited to the infected lungs and secrete pro-inflammatory cytokines like IFN-γ,  
 265 TNF and IL-2, triggering host cellular immunity and inflammatory responses to  
 266 eliminate the intracellular *Mtb*.

267
